# Supplementary material
Source: PubMed Central journal article supplement (PMC8221739)
Supplement: mmc1.pdf [file mmc1.pdf]

# THE LANCET

## Infectious Diseases

### Supplementary appendix 1

This translation in Hindi was submitted by the authors and we reproduce it as supplied. It has not been peer reviewed. *The Lancet's* editorial processes have only been applied to the original in English, which should serve as reference for this manuscript.

Supplement to: Ella R, Reddy S, Jogdand H, et al. Safety and immunogenicity of an inactivated SARS-CoV-2 vaccine, BBV152: interim results from a double-blind, randomised, multicentre, phase 2 trial, and 3-month follow-up of a double-blind, randomised phase 1 trial. *Lancet Infect Dis* 2021; published online March 8. [https://doi.org/10.1016/S1473-3099\(21\)00070-0](https://doi.org/10.1016/S1473-3099(21)00070-0).

हिंदी में यह अनुवाद लेखकों द्वारा प्रस्तुत किया गया था और हम इसे जैसे उपलब्ध कराया गया वैसे पुनः पेश करते हैं। इस पर सहकर्मों की समीक्षा नहीं की गई है। लैंसेट की संपादकीय प्रक्रियाओं को केवल अंग्रेजी में मूल पर लागू किया गया है, जो इस पांडुलिपि के संदर्भ के रूप में काम आना चाहिए।

## सारांश

### पृष्ठभूमि:

BBV152 (कोवैक्सीन/कोविड-19 वैक्सीन) यह एक संपूर्ण निष्क्रिय विषाणु (SARS-CoV-2/ सीवियर एक्यूट रिस्पेरेटरी सिंड्रोम कोरोनावायरस-2) आधारित वैक्सीन या इनएक्टिवेटेड वायरस वैक्सीन (खुराक 3µg या 6µg) जिसे टोल की तरह रिसेप्टर्स 7/8 एगोनिस्ट (Toll-like receptor (TLR) 7/8 agonists) के साथ एलम (Algel-IMDG) के ऊपर अधिशोषित करके निर्मित किया गया है।

इस से पूर्व हमने BBV152 प्रथम चरण के निष्कर्ष प्रकाशित किए हैं, जो की सुरक्षा और प्रतिरक्षा पर यादृच्छिक, दोहरा-अंधा परीक्षण (randomised, double-blind trial) (0 और 14 के दिनों में टीकाकरण की प्रक्रिया) है, इस प्रथम चरण में तीन अलग-अलग सूत्रीकरण/योगों और एक नियंत्रण शाखा जिसमें केवल एलम (Algel-IMDG) (बिना एंटीजन) शामिल है। दूसरे चरण (दिन 0 और 28) के अध्ययन के लिए दो सूत्रीकरण/योगों का चयन किया गया था।

यहाँ हम BBV152 के संरक्षा और प्रतिरक्षा पर द्वितीय चरण परीक्षण के अंतरिम निष्कर्ष को बता रहे हैं जिसमें पहली एवं दूसरी खुराक के बीच 28 दिनों का अंतराल रखा गया था।

### पद्धतियाँ:

हमने BBV152 की प्रतिरक्षा और सुरक्षा का मूल्यांकन करने के लिए द्वितीय चरण का क्लिनिकल परीक्षण भारत के नौ अस्पतालों में स्वस्थ वयस्कों और कुछ किशोरों (12-65 आयु वर्ग) में एक बहु-केंद्रीय, अक्रमिक, दोहरा-अंधा परीक्षण किया। SARS-CoV-2 न्यूक्लिक एसिड और सीरोलॉजी जांच में पॉजिटिव पाए गए प्रतिभागियों को क्लिनिकल परीक्षण से बाहर रखा गया। दोनों टीकाकरण खुराक (3µg या 6µg) समान अनुपात(1:1) में प्राप्त करने के लिए प्रतिभागियों का अक्रमिकरण किया गया था। ब्लॉक रैंडमाइजेशन एक इंटरैक्टिव वेब रिस्पांस सिस्टम के उपयोग द्वारा किया गया था। उपचार समूह आवंटन प्रक्रिया के दौरान प्रतिभागी, जांचकर्ता, अध्ययन समन्वयक, अध्ययन से संबंधित कर्मी और प्रायोजको की पहचान उपचार समूह आवंटन प्रक्रिया तक सीमित रखा गया। वैक्सीन की दो इंटरामस्क्युलर खुराक 0 और 28 दिन के अंतराल पर दी गई थी।

प्राथमिक परिणाम वाइल्ड-टाइप वायरस बेअसर करने की क्षमता पर आधारित प्लेक रिडक्शन न्यूट्रलाइजेशन टेस्ट (PRNT<sub>50</sub>) और माइक्रो न्यूट्रलाइजेशन टेस्ट (MNT<sub>50</sub>) सेरोकोनवर्सन रेट (टीकाकरण के बाद का टाइट्र बेसलाइन की तुलना में कम से कम चार गुना अधिक था /बेसलाइन के 4 गुना ऊपर) दूसरी खुराक चार सप्ताह के अंतर (दिन 56) पर मापा गया। प्राथमिक परिणाम का मूल्यांकन उन सभी प्रतिभागियों में किया गया था जिन्हें वैक्सीन की दोनों खुराक मिली थीं। द्वितीयक परिणामों रूप में सेल-मध्यस्थता प्रतिक्रियाओं (Cell-mediated responses) का परिणाम जिसे टी-हेल्पर-1(Th1)/(Th2) प्रोफाइलिंग द्वारा दूसरी खुराक के बाद 2 सप्ताह (दिन 42) का आकलन किया गया था।

सभी प्रतिभागियों में सुरक्षा का आकलन किया गया था, जिन्हें वैक्सीन की कम से कम एक खुराक मिली थी।

इसके अलावा अनुवर्ती रक्त जांच, जिसमें प्रथम चरण प्रतिभागियों से 104 वे दिन पर रक्त नमूने एकत्र किया गया था, उनमें प्रतिरक्षा की रिपोर्ट पाई गई। यह निरीक्षण ClinicalTrials.gov/in पर पंजीकृत है।

### निष्कर्ष:

5 से 12 सितंबर 2020 के बीच, 921 प्रतिभागियों की स्क्रीनिंग की गई, जिनमें से 380 को नामांकित किया गया था और अक्रमिक ढंग से 3 µg Algel-IMDG या 6 µg Algel-IMDG कि खुराक दी गई।

56 वें दिन 6 µg Algel-IMDG गुप का टाइट्र का ज्यामितीय मध्यमान (GMTs, PRNT<sub>50</sub>) (197.0 [95% CI 155.6-249.4]) 3 µg Algel-IMDG (100.9 [74.1-137.4]; p=0.0041)। समूह से ज्यादा था।

56 वें दिन निष्प्रभावीकरण जांच (PRNT<sub>50</sub>) के आधार पर 3 µg समूह में 184 में से 171 एवं 6 µg समूह में 177 में से 174 प्रतिभागियों में seroconversion देखा गया। ज्यामितीय मध्यमान (GMTs, PRNT<sub>50</sub>) 3 µg समूह में 92.9 (95% CI 88.2-96.2) एवं 6 µg समूह में 160.1 (135.8, 188.8) था। वहीं 56 वें दिन माइक्रो निष्प्रभावीकरण जांच (MNT<sub>50</sub>) के आधार पर 3 µg समूह में 184 में से 162 (88.0% [95% CI 82.4-92.3]) एवं 6 µg समूह में 177 में से 171 प्रतिभागियों में seroconversion देखा गया।

42 वें दिन 3 µg एवं 6 µg निरूपणों में टी-सेल प्रतिक्रिया टी हेल्पर1 फिनोटाइप की तरफ पाया गया। शून्य से सात(0-7) व 28-35 दिनों के बीच दोनों टीकों वाले समूहों के सुनियोजित प्रतिकूल प्रतिक्रियाओं 3 µg एवं 6 µg समूह में 190 में से 38 एवं 40 क्रमशः, में कोई विशेष अंतर नहीं देखा गया, और अध्ययन के दौरान कोई भी गंभीर प्रतिकूल घटना नहीं घटी।

प्रथम चरण प्रतिभागियों में से 104 वे दिन पर GMTs (MNT<sub>50</sub>) परिणाम खुराक 3 µg या 6 µg एलम के साथ (Algel-IMDG), 6 µg एलम और केवल एलम के साथ वाले समूहों के साथ क्रमशः 39.9 (32.0, 49.9), 69.5 (53.7, 89.9), 53.3 (40.1, 71.0), और 20.7 (14.5, 29.5) थे।

### व्याख्या:

BBV152 ने प्रथम चरण के परीक्षण में उच्च स्तर में न्यूट्रलाइजिंग एंटीबॉडीज का निर्माण किया जिसे दूसरे टीकाकरण के तीन महीने बाद भी सभी प्रतिभागियों में ऊंचा और स्थिर पाया गया। पहले चरण की तुलना में दूसरे चरण के परीक्षण में BBV152 ने बेहतर अभिक्रियाशीलता, अच्छे सुरक्षा परिणाम, उच्च स्तर का शारीरिक, कोशिका-मध्यित प्रतिक्रियाएं दिखाया। अतः 6 मा.ग्रा. (Algel-IMDG) खुराक को तीसरे चरण के प्रभावकारिता परीक्षण के लिए चयनित किया गया।

### अनुदान:

यह काम भारत बायोटेक इंटरनेशनल लिमिटेड द्वारा समर्थित और वित्त पोषित है।
